# Supplementary material for: Load-Dependent Prefrontal Cortex Activation Assessed by Continuous-Wave Near-Infrared Spectroscopy during Two Executive Tasks with Three Cognitive Loads in Young Adults
Source: MDPI journal article supplement (doi:10.3390/brainsci12111462), 2022-10-28
Supplement: s1 [file s1]

## Supplementary Material

### n-back task

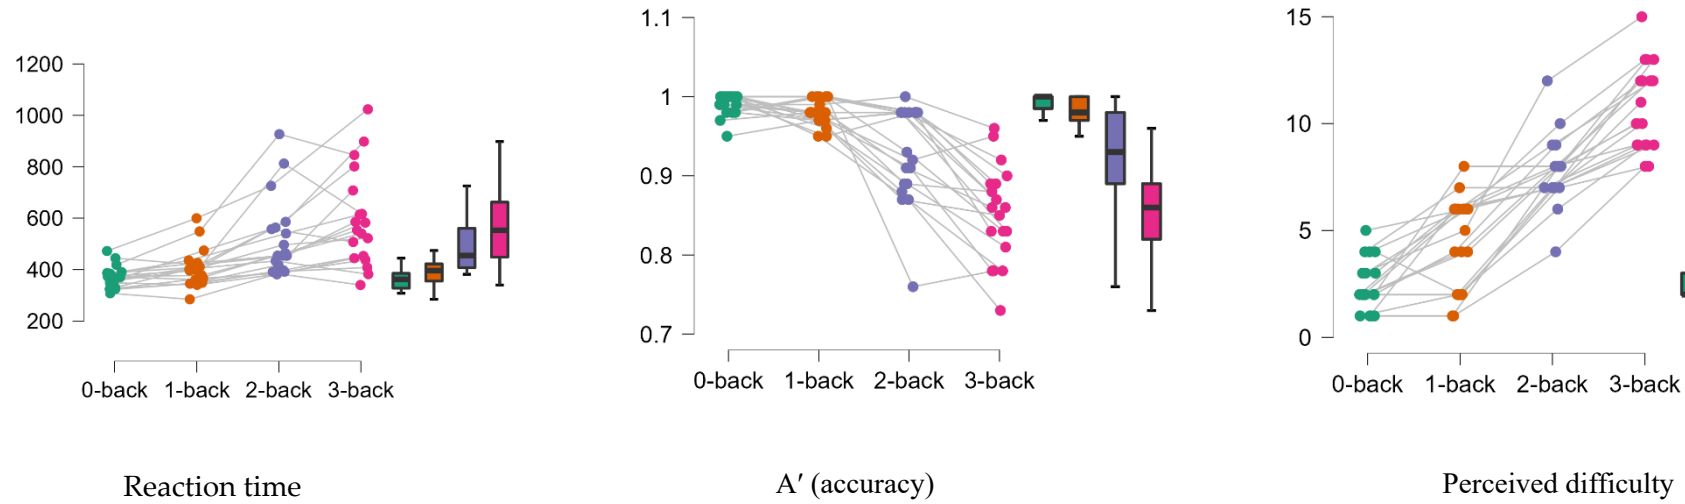

S.1. Mean of each participant Reaction Time (ms), A'score (0-1) and perceived difficulty (0-15) as function of cognitive load during the n-back task.

## Random Number Generation task

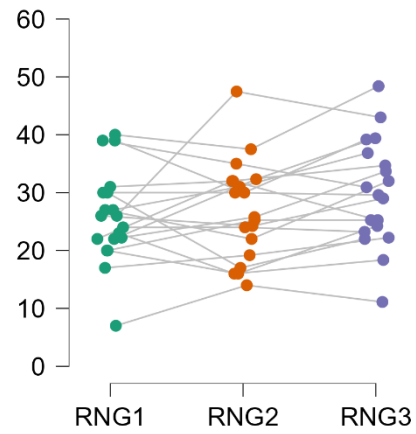

Adjacency

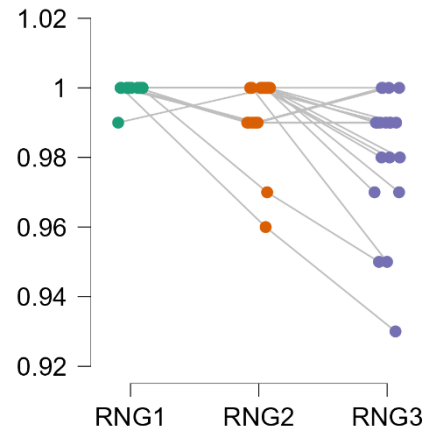

Success rate

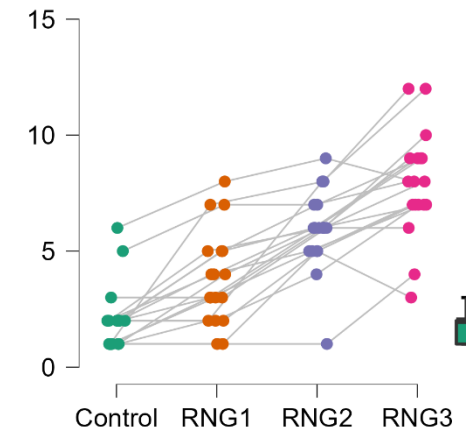

Perceived difficulty

S.2. Mean of each individual Adjacency score (%), success rate (0-1) and perceived difficulty (0-15) as a function of cognitive load during the RNG task.
